# Supplementary material for: Linking northeastern North Pacific oxygen changes to upstream surface outcrop variations
Source: Copernicus journal article supplement (doi:10.5194/bg-2023-132), 2023-08-23
Supplement: Supplementary file [file bg-2023-132-AC1-supplement.pdf]

## Author response to Reviewer #2 comments:

Reviewer comments are in black, and our responses are in red.

I really enjoyed reading this manuscript. It is well-written, explores a simple idea very effectively and puts the results in context in a way that makes them potentially very useful.

I think this manuscript could be published as is (aside from a single typo) -- the figures are very readable and the text succinct and clear. However, I nevertheless will provide a few suggestions that I think would improve the impact of the manuscript.

Thank you for the encouraging comments. Below we provide responses to individual points raised and how we would incorporate suggestions when revising the manuscript (if invited to do so).

Line 39: Could also mention that similar cycles have been seen in DIC (e.g. Figure 7 in Franco et al 2021) -- this would allow you to pick up this point again at the end and suggest what you saw might also apply to CO<sub>2</sub>/DIC.

We appreciate the comment and will add a sentence that O<sub>2</sub> variability is closely linked to DIC (and nutrient) variability that has also been observed at OSP.

Line 235: I found the lagged correlations (Figure 5) really interesting as a way to assess how long it takes water to get from the NW Pacific to OSP (and the NE Pacific). My immediate question was: what does it look like for other isopycnals? It'd be powerful to see an increase with density and also really useful to have an idea of how fast signals are transmitted at different depth/isopycnals. I think you could make a nice comparison with Ueno & Yasuda 2003's Figure 7 (based on simple model).

Thank you for the suggestion. We looked at correlations between O<sub>2</sub> on isopycnals other than  $\sigma_\theta = 26.6 \text{ kg m}^{-3}$  (lighter and heavier) and outcrop area - first using the same outcrop area ( $\sigma_\theta = 26.4\text{--}26.7 \text{ kg m}^{-3}$ ) as used for the correlation in Figure 5 (line 235). For the lighter (i.e., outcropping) isopycnals we also investigated correlations with the outcropping area for densities bracketing the isopycnals themselves ( $\sigma_\theta = 26.3\text{--}26.5 \text{ kg m}^{-3}$  for  $\sigma_\theta = 26.4 \text{ kg m}^{-3}$ ;  $\sigma_\theta = 26.2\text{--}26.4$  for  $\sigma_\theta = 26.3 \text{ kg m}^{-3}$ ). However, we do not find a depth trend in the O<sub>2</sub> lag for these lighter isopycnals, independent of which outcrop area we use. This is in part because the O<sub>2</sub> cycles on these isopycnals at OSP do not show any temporal offsets from one isopycnal to another (i.e. O<sub>2</sub> cycles on  $\sigma_\theta = 26.2\text{--}26.6 \text{ kg m}^{-3}$  in Figure 3 are in sync with each other) even though travel times from outcrop area to OSP should be less on the lighter isopycnals. Our explanation for this is that the O<sub>2</sub> signal on the  $\sigma_\theta = 26.6 \text{ kg m}^{-3}$  isopycnal is dominant because this isopycnal is at the bottom of the ventilated thermocline and the signal can be distributed to the lighter isopycnals through vertical mixing, thus the O<sub>2</sub> variability on the lighter isopycnals is in phase with  $\sigma_\theta = 26.6 \text{ kg m}^{-3}$ .

On the other hand, for the heavier isopycnals ( $\sigma_\theta > 26.6 \text{ kg m}^{-3}$ ) we do find an indication that the lag between O<sub>2</sub> and  $\sigma_\theta = 26.4\text{--}26.7 \text{ kg m}^{-3}$  outcrop area increases with depth. For example for  $\sigma_\theta$

=  $27.0 \text{ kg m}^{-3}$ , the best correlation for  $\text{O}_2$  lagging outcrop area is at  $\sim 14$  years as shown in the figure below (same as Figure 5 in the manuscript except that  $\text{O}_2$  on  $\sigma_\theta = 27.0 \text{ kg m}^{-3}$  is used):

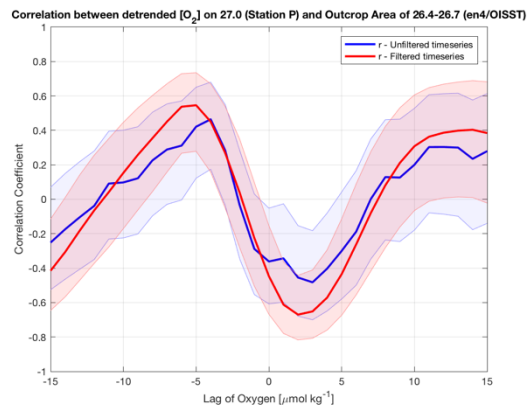

This is qualitatively consistent with Figure 7 by Ueno and Yasuda (2003) which shows, as you mention, travel times increasing with density (from  $\sigma_\theta = 26.7 \text{ kg m}^{-3}$  to  $\sigma_\theta = 27.2 \text{ kg m}^{-3}$  in that case). We will mention this depth dependence of the lag where Figure 5 is discussed in the manuscript (lines 211–218) and can include the figure above in a revised manuscript (appendix) for illustration.

Line 342: Excellent point! It'd be really useful if you were able to suggest some ideas for what they might look like.

If we understand correctly, this comment refers to the suggestion on line 342 that “a climate index that better incorporates salinity is needed”. We think that such an index should include E-P data from the northwestern North Pacific and/or surface salinity measurements at key entry points to the northwestern North Pacific. We will add some elaboration on the index at line 342 and in the conclusion section (where it also gets mentioned in the last sentence).

Line 347: Here's where I think the typo is. Is/are word/s missing? I find this phrasing confusing.

Yes, it should be “ventilated thermocline”, not just “ventilated”. Thank you for catching this typo. We will fix it.

**Citation:** <https://doi.org/10.5194/bg-2023-132-RC2>
